# Supplementary material for: Direct and Long-Term Metabolic Consequences of Lowly vs. Highly-Digestible Starch in the Early Post-Weaning Diet of Mice
Source: PubMed Central journal article supplement (PMC6265974; doi:10.3390/nu10111788), 2018-11-17
Supplement: nutrients-10-01788-s001.pdf [file nutrients-10-01788-s001.pdf]

# Supplementary file

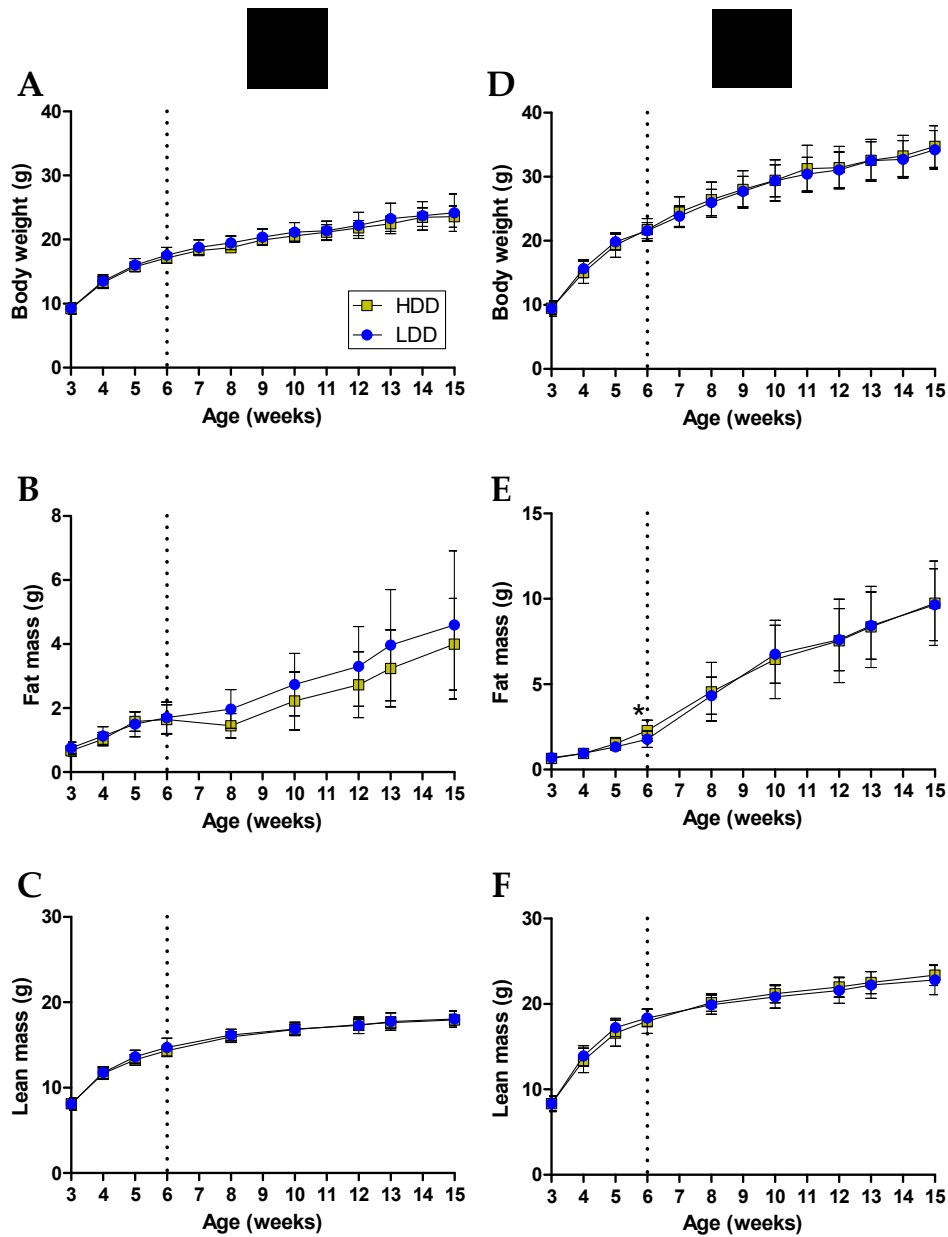

**Figure S1.** Body weight and body composition development. (A) Body weight (BW), (B) fat mass (FM), and (C) lean mass (LM) of females from weaning at postnatal week (PW) 3 until the end of the study ( $n = 24$  per group from PW 3 through 6;  $n = 12$  per group from PW 7 through 15). (D) BW, (E) FM, and (F) LM of males from weaning at PW 3 until the end of the study ( $n = 24$  for HDD and  $n = 23$  for LDD from PW 3 through 6;  $n = 12$  per group from PW 7 through 15). To test for nutritional programming effects independently of initial differences at the start of HFD feeding, data corresponding to the starch intervention period ( $n = 23$ -24 per group and sex) and the HFD period ( $n = 12$  per group and sex) were analysed separately by repeated measurements two-way ANOVA with Bonferroni's *post hoc* test. In both sexes and periods, both HDD and LDD gained BW, FM, and LM over time ( $p < 0.0001$ ). No difference was seen between the two dietary groups, except for the increase in FM in males during the intervention period ( $F = 4.8$ ,  $p = 0.0344$ ). However, males fed LDD *vs* HDD during the intervention period gained BW ( $F = 2.9$ ,  $p = 0.0355$ ) and FM ( $F = 8.5$ ,  $p < 0.0001$ ) at a lower rate, reaching a significant difference in FM at PW 6 ( $p < 0.0001$ ). Data shown as mean  $\pm$  s.d. The dotted line indicates the start of HFD feeding.

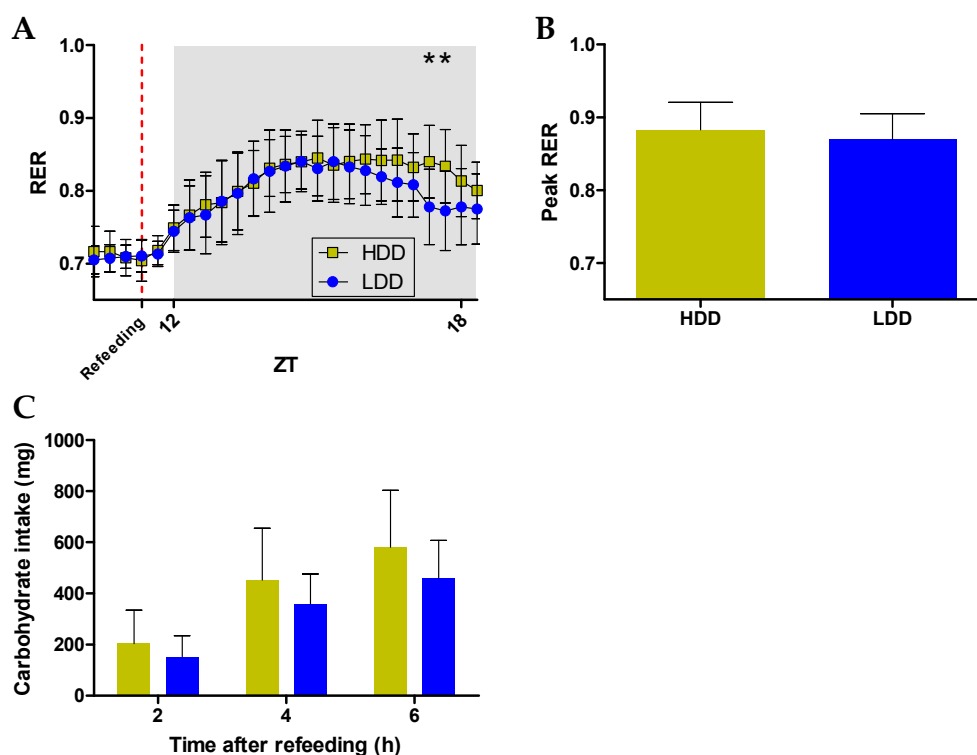

**Figure S2.** Metabolic flexibility of male mice after 8 weeks of HFD feeding (PW 14). (A) RER evolution 1 h before refeeding until 7 h upon *ad libitum* refeeding with a high carbohydrate diet (HDD). Statistical comparison was performed on all data points from the moment of food restriction (additional data points not shown to enhance visualisation). There was a significant interaction of time x post-weaning diet ( $p=0.0163$ ). (B) Mean peak RER values achieved within 7 h after refeeding. (C) Cumulative carbohydrate intake calculated from automatic records of food intake after access to refeeding diet.  $n = 12$  per group. Data shown as mean  $\pm$  s.d. Statistical differences denoted as \*  $p \leq 0.001$ .

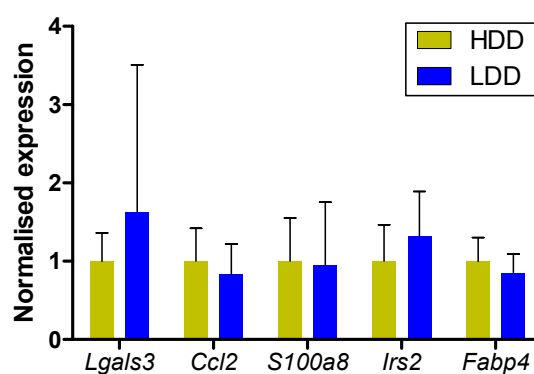

**Figure S3.** Gene expression in gWAT of females after the HFD feeding period (PW 15).  $n = 11$  for HDD and  $n = 10$  for LDD. Values are given relative to the mean normalised gene expression of the HDD group for each gene and plotted as mean  $\pm$  s.d. *Lgals3*: lectin, galactose binding, soluble 3; *Ccl2*: chemokine (C-C motif) ligand 2; *S100a8*: S100 calcium binding protein A8 (calgranulin A); *Irs2*: insulin receptor substrate 2; *Fabp4*: fatty acid binding protein 4, adipocyte.

**Table S1.** Primers used for gWAT gene expression analysis.

| <b>Gene symbol</b> | <b>Official Name</b>                            | <b>Forward primer sequence (5'-3')</b> | <b>Reverse primer sequence (5'-3')</b> | <b>Annealing temperature (°C)</b> |
|--------------------|-------------------------------------------------|----------------------------------------|----------------------------------------|-----------------------------------|
| <i>Ccl2</i>        | chemokine (C-C motif) ligand 2                  | TTAAAAACCTGGATCGGAACCAA                | GCATTAGCTTCAGATTTACGGGT                | 58.0                              |
| <i>Lgals3</i>      | lectin, galactose binding, soluble 3            | TAATCAGGTGAGCGGCACAG                   | GCTAAGGCATCGTTAAGCGAAA                 | 58.0                              |
| <i>S100a8</i>      | S100 calcium binding protein A8 (calgranulin A) | ACTTCGAGGAGTTCCTTGCG                   | TGCTACTCCTTGTGGCTGTC                   | 60.0                              |
| <i>Irs2</i>        | insulin receptor substrate 2                    | GCACCTATGCAAGCATCGAC                   | GCGCTTCACTCTTTCACGAC                   | 60.0                              |
| <i>Fabp4</i>       | fatty acid binding protein 4, adipocyte         | AATCACCGCAGACGACAGGAAG                 | TGCCCTTTCATAAACTCTTGTGGAAG             | 60.0                              |
| <i>B2m</i>         | beta-2 microglobulin                            | CCCCACTGAGACTGATACATACGC               | AGAAACTGGATTTGTAATTAAGCAGGTTTC         | 60.0                              |
| <i>Rps15</i>       | ribosomal protein S15                           | CGGAGATGGTGGGTAGCATGG                  | ACGGGTTTGTAGGTGATGGAGAAC               | 60.0                              |
